# Supplementary material for: A TLR3 Ligand Reestablishes Chemotherapeutic Responses in the Context of FPR1 Deficiency
Source: Oxford University Press journal article supplement (doi:10.1158/2159-8290.cd-20-0465), 2020-10-12
Supplement: 21598290cd200465-sup-241074_2_supp_6582081_qgslv3.xlsx [file 21598290cd200465-sup-241074_2_supp_6582081_qgslv3.xlsx]

## Sheet: Fig 1C to E
Fig 1C
Group 1	Group 2	Adjusted p value
Ctr	WT	0.0149
Ctr	Fpr1-/-	0.5793
Fpr1-/-	WT	0.0348
Fig 1D
Group 1	Group 2	Adjusted p value
PBS+Iso	PBS+ANXA1ab	0.6941
PBS+Iso	DCwt+Iso	<0.0001
DCwt+ANXA1ab	PBS+Iso	0.7137
PBS+ANXA1ab	DCwt+Iso	<0.0001
DCwt+ANXA1ab	PBS+ANXA1ab	0.4467
DCwt+ANXA1ab	DCwt+Iso	<0.0001
Fig 1E
Group 1	Group 2	Adjusted p value
PBS+CD4ab+CD8ab	PBS+Iso	0.5680
PBS+Iso	DCwt+Iso	0.0019
DCwt+CD4ab+CD8ab	PBS+Iso	0.3956
PBS+CD4ab+CD8ab	DCwt+Iso	0.0006
DCwt+CD4ab+CD8ab	PBS+CD4ab+CD8ab	0.7851
DCwt+CD4ab+CD8ab	DCwt+Iso	0.0003

## Sheet: Fig 2B to D
Fig 2B	Bonferroni's multiple comparisons test	95% CI of diff.	Summary	Adjusted P Value			Fig 2C
							Uncorrected Fisher's LSD	Predicted (LS) mean diff,	95,00% CI of diff,	p value
Concentration (mg/ml )	Compared to untreated WT
	Control	-0.7490 to 0.7490	ns	> 0.9999		Dose	0
0.03125	C12-iE-DAP	-0.7155 to 0.7826	ns	> 0.9999			Non-target vs. Fpr1	798.1	622,7 to 973,5	<0,0001
0.03125	MDP	-0.6702 to 0.8279	ns	> 0.9999			Non-target vs. Tlr3	302.1	126,7 to 477,4	0.0011
0.00156	FLA-BS	-0.4863 to 1.012	ns	> 0.9999			Non-target vs. Fpr1 + Tlr3	808.1	632,7 to 983,5	<0,0001
0.03125	LPS-B5	-0.3303 to 1.168	ns	> 0.9999
0.03125	pIC	-0.8735 to 0.6245	ns	> 0.9999
0.00156	ODN1826	-0.8453 to 0.6528	ns	> 0.9999
0.03125	Pam3CSK4	-0.9390 to 0.5591	ns	> 0.9999		Dose	0.5
0.03125	R848	-0.7421 to 0.7560	ns	> 0.9999			Non-target vs. Fpr1	32.52	-127,6 to 192,6	0.6855
	Control	-0.7490 to 0.7490	ns	> 0.9999			Non-target vs. Tlr3	295	134,9 to 455,2	0.0005
0.0625	C12-iE-DAP	-1.194 to 0.3040	ns	> 0.9999			Non-target vs. Fpr1 + Tlr3	665	504,9 to 825,1	<0,0001
0.0625	MDP	-0.7943 to 0.7038	ns	> 0.9999
0.03125	FLA-BS	-1.375 to 0.1234	ns	0.3231
0.0625	LPS-B5	-0.8082 to 0.6899	ns	> 0.9999			Fig 2D
0.0625	pIC	-0.3468 to 1.151	ns	> 0.9999
0.03125	ODN1826	-0.4965 to 1.002	ns	> 0.9999			Group 1	Group 2	Adjusted p value
0.0625	Pam3CSK4	-1.077 to 0.4216	ns	> 0.9999			PBS	PBS+PolyIC	0.0053
0.0625	R848	-0.5954 to 0.9027	ns	> 0.9999			PBS	DC Fpr1_ko+PBS	0.7576
	Control	-0.7490 to 0.7490	ns	> 0.9999			PBS	DC Fpr1_ko+PolyIC	<0.0001
0.125	C12-iE-DAP	-0.6487 to 0.8494	ns	> 0.9999			DC Fpr1_ko+PBS	PBS+PolyIC	0.0111
0.125	MDP	-0.1930 to 1.305	ns	0.8234			PBS+PolyIC	DC Fpr1_ko+PolyIC	0.3128
0.0625	FLA-BS	-0.01019 to 1.488	ns	0.0589			DC Fpr1_ko+PBS	DC Fpr1_ko+PolyIC	<0.0001
0.125	LPS-B5	-0.1909 to 1.307	ns	0.8015
0.125	pIC	-0.4846 to 1.014	ns	> 0.9999
0.0625	ODN1826	-0.3080 to 1.190	ns	> 0.9999
0.125	Pam3CSK4	-0.3693 to 1.129	ns	> 0.9999
0.125	R848	-0.2793 to 1.219	ns	> 0.9999
	Control	-0.7490 to 0.7490	ns	> 0.9999
0.25	C12-iE-DAP	-0.6263 to 0.8718	ns	> 0.9999
0.25	MDP	-0.7919 to 0.7062	ns	> 0.9999
0.125	FLA-BS	-0.9095 to 0.5886	ns	> 0.9999
0.25	LPS-B5	-0.8577 to 0.6404	ns	> 0.9999
0.25	pIC	-2.147 to -0.6493	****	< 0.0001
0.125	ODN1826	-0.6834 to 0.8147	ns	> 0.9999
0.25	Pam3CSK4	-1.154 to 0.3440	ns	> 0.9999
0.25	R848	-0.7669 to 0.7312	ns	> 0.9999
	Control	-0.7490 to 0.7490	ns	> 0.9999
0.5	C12-iE-DAP	-1.902 to -0.4040	****	< 0.0001
0.5	MDP	-2.976 to -1.478	****	< 0.0001
0.25	FLA-BS	-2.076 to -0.5775	****	< 0.0001
0.5	LPS-B5	-1.223 to 0.2751	ns	> 0.9999
0.5	pIC	-0.9568 to 0.5413	ns	> 0.9999
0.25	ODN1826	-0.6581 to 0.8400	ns	> 0.9999
0.5	Pam3CSK4	-0.6408 to 0.8573	ns	> 0.9999
0.5	R848	-1.300 to 0.1983	ns	0.8816
	Control	-0.7490 to 0.7490	ns	> 0.9999
1	C12-iE-DAP	-1.160 to 0.3382	ns	> 0.9999
1	MDP	-0.8864 to 0.6117	ns	> 0.9999
0.5	FLA-BS	-1.148 to 0.3498	ns	> 0.9999
1	LPS-B5	-0.9473 to 0.5508	ns	> 0.9999
1	pIC	-1.047 to 0.4509	ns	> 0.9999
0.5	ODN1826	-0.5110 to 0.9871	ns	> 0.9999
1	Pam3CSK4	-1.117 to 0.3808	ns	> 0.9999
1	R848	-0.2312 to 1.267	ns	> 0.9999
	Control	-0.7490 to 0.7490	ns	> 0.9999
2	C12-iE-DAP	-0.9198 to 0.5783	ns	> 0.9999
2	MDP	-0.5898 to 0.9083	ns	> 0.9999
1	FLA-BS	-0.6623 to 0.8358	ns	> 0.9999
2	LPS-B5	-0.7067 to 0.7914	ns	> 0.9999
2	pIC	-0.7746 to 0.7235	ns	> 0.9999
1	ODN1826	-0.3772 to 1.121	ns	> 0.9999
2	Pam3CSK4	-0.8797 to 0.6184	ns	> 0.9999
2	R848	-0.8034 to 0.6947	ns	> 0.9999
	Control	-0.7490 to 0.7490	ns	> 0.9999
4	C12-iE-DAP	-1.043 to 0.4547	ns	> 0.9999
4	MDP	-0.6337 to 0.8644	ns	> 0.9999
2	FLA-BS	-0.6409 to 0.8572	ns	> 0.9999
4	LPS-B5	-0.7213 to 0.7768	ns	> 0.9999
4	pIC	-0.6325 to 0.8656	ns	> 0.9999
2	ODN1826	-0.3866 to 1.111	ns	> 0.9999
4	Pam3CSK4	-0.6474 to 0.8507	ns	> 0.9999
4	R848	-0.7667 to 0.7314	ns	> 0.9999
	Compared to untreated Fpr1-/-
	Control	-0.1983 to 0.1983	ns	> 0.9999
Concentration 1	C12-iE-DAP	-0.2411 to 0.1555	ns	> 0.9999
Concentration 1	MDP	-0.2645 to 0.1320	ns	> 0.9999
Concentration 1	FLA-BS	-0.2403 to 0.1563	ns	> 0.9999
Concentration 1	LPS-B5	-0.2162 to 0.1804	ns	> 0.9999
Concentration 1	pIC	-0.2852 to 0.1113	ns	> 0.9999
Concentration 1	ODN1826	-0.2471 to 0.1494	ns	> 0.9999
Concentration 1	Pam3CSK4	-0.2567 to 0.1398	ns	> 0.9999
Concentration 1	R848	-0.1601 to 0.2364	ns	> 0.9999
	Control	-0.1983 to 0.1983	ns	> 0.9999
Concentration 2	C12-iE-DAP	-0.2919 to 0.1046	ns	> 0.9999
Concentration 2	MDP	-0.2848 to 0.1117	ns	> 0.9999
Concentration 2	FLA-BS	-0.3275 to 0.06905	ns	> 0.9999
Concentration 2	LPS-B5	-0.2630 to 0.1335	ns	> 0.9999
Concentration 2	pIC	-0.7926 to -0.3961	****	< 0.0001
Concentration 2	ODN1826	-0.2216 to 0.1749	ns	> 0.9999
Concentration 2	Pam3CSK4	-0.2181 to 0.1785	ns	> 0.9999
Concentration 2	R848	-0.2546 to 0.1420	ns	> 0.9999
	Control	-0.1983 to 0.1983	ns	> 0.9999
Concentration 3	C12-iE-DAP	-0.2467 to 0.1499	ns	> 0.9999
Concentration 3	MDP	-0.2147 to 0.1818	ns	> 0.9999
Concentration 3	FLA-BS	-0.2127 to 0.1839	ns	> 0.9999
Concentration 3	LPS-B5	-0.2313 to 0.1653	ns	> 0.9999
Concentration 3	pIC	-0.7204 to -0.3239	****	< 0.0001
Concentration 3	ODN1826	-0.1973 to 0.1993	ns	> 0.9999
Concentration 3	Pam3CSK4	-0.1916 to 0.2050	ns	> 0.9999
Concentration 3	R848	-0.1794 to 0.2171	ns	> 0.9999
	Control	-0.1983 to 0.1983	ns	> 0.9999
Concentration 4	C12-iE-DAP	-0.1285 to 0.2681	ns	> 0.9999
Concentration 4	MDP	-0.2966 to 0.09997	ns	> 0.9999
Concentration 4	FLA-BS	-0.3857 to 0.01083	ns	0.0956
Concentration 4	LPS-B5	-0.3330 to 0.06352	ns	> 0.9999
Concentration 4	pIC	-0.9994 to -0.6029	****	< 0.0001
Concentration 4	ODN1826	-0.1721 to 0.2244	ns	> 0.9999
Concentration 4	Pam3CSK4	-0.2701 to 0.1264	ns	> 0.9999
Concentration 4	R848	-0.2750 to 0.1216	ns	> 0.9999
	Control	-0.1983 to 0.1983	ns	> 0.9999
Concentration 5	C12-iE-DAP	-0.3668 to 0.02973	ns	0.2764
Concentration 5	MDP	-0.5658 to -0.1693	****	< 0.0001
Concentration 5	FLA-BS	-0.4007 to -0.004176	*	0.0386
Concentration 5	LPS-B5	-0.3975 to -0.0009262	*	0.0472
Concentration 5	pIC	-2.289 to -1.893	****	< 0.0001
Concentration 5	ODN1826	-0.07884 to 0.3177	ns	> 0.9999
Concentration 5	Pam3CSK4	-0.08172 to 0.3148	ns	> 0.9999
Concentration 5	R848	-0.1534 to 0.2432	ns	> 0.9999
	Control	-0.1983 to 0.1983	ns	> 0.9999
Concentration 6	C12-iE-DAP	-0.1867 to 0.2099	ns	> 0.9999
Concentration 6	MDP	-0.3012 to 0.09533	ns	> 0.9999
Concentration 6	FLA-BS	-0.4518 to -0.05525	**	0.0012
Concentration 6	LPS-B5	-0.3319 to 0.06464	ns	> 0.9999
Concentration 6	pIC	-1.457 to -1.060	****	< 0.0001
Concentration 6	ODN1826	0.01975 to 0.4163	*	0.0142
Concentration 6	Pam3CSK4	-0.1235 to 0.2730	ns	> 0.9999
Concentration 6	R848	-0.08497 to 0.3116	ns	> 0.9999
	Control	-0.1983 to 0.1983	ns	> 0.9999
Concentration 7	C12-iE-DAP	-0.2007 to 0.1959	ns	> 0.9999
Concentration 7	MDP	-0.3694 to 0.02717	ns	0.2406
Concentration 7	FLA-BS	-0.3712 to 0.02531	ns	0.2173
Concentration 7	LPS-B5	-0.3843 to 0.01226	ns	0.1039
Concentration 7	pIC	-0.3025 to 0.09408	ns	> 0.9999
Concentration 7	ODN1826	-0.2650 to 0.1315	ns	> 0.9999
Concentration 7	Pam3CSK4	-0.2389 to 0.1576	ns	> 0.9999
Concentration 7	R848	-0.2161 to 0.1805	ns	> 0.9999
	Control	-0.1983 to 0.1983	ns	> 0.9999
Concentration 8	C12-iE-DAP	-0.2139 to 0.1826	ns	> 0.9999
Concentration 8	MDP	-0.1997 to 0.1969	ns	> 0.9999
Concentration 8	FLA-BS	-0.2472 to 0.1494	ns	> 0.9999
Concentration 8	LPS-B5	-0.1956 to 0.2009	ns	> 0.9999
Concentration 8	pIC	-0.1661 to 0.2305	ns	> 0.9999
Concentration 8	ODN1826	-0.1086 to 0.2879	ns	> 0.9999
Concentration 8	Pam3CSK4	-0.2672 to 0.1293	ns	> 0.9999
Concentration 8	R848	-0.2369 to 0.1597	ns	> 0.9999

## Sheet: Fig 3A_MCAWT MTX
Group 1	Group 2	Adjusted p value
PBS	CTX	0.0684
PBS	CTX+pIC	0.3511
PBS	MTX	<0.0001
PBS	MTX+CTX	<0.0001
PBS	MTX+CTX+pIC	<0.0001
PBS	MTX+pIC	<0.0001
PBS	pIC	0.4522
pIC	CTX	0.5509
pIC	CTX+pIC	0.0346
pIC	MTX	<0.0001
pIC	MTX+CTX	<0.0001
pIC	MTX+CTX+pIC	<0.0001
pIC	MTX+pIC	<0.0001
CTX	MTX	0.0100
CTX	MTX+CTX	0.1238
CTX	MTX+CTX+pIC	0.0021
CTX	MTX+pIC	0.3017
CTX+pIC	CTX	0.5645
CTX+pIC	MTX	0.0015
CTX+pIC	MTX+CTX	0.0217
CTX+pIC	MTX+CTX+pIC	0.0003
CTX+pIC	MTX+pIC	0.0570
MTX	MTX+CTX+pIC	0.6307
MTX+CTX	MTX	0.4133
MTX+CTX	MTX+CTX+pIC	0.1968
MTX+pIC	MTX	0.2592
MTX+pIC	MTX+CTX	0.7530
MTX+pIC	MTX+CTX+pIC	0.1106

## Sheet: Fig 3B_acd4acd8WT
Group 1	Group 2	Adjusted p value
aCD4aCD8	aCD4	0.0060
aCD8	aCD4	0.1726
Isotype	aCD4	0.5378
aCD4	MCP	0.0087
aCD4	MCPaCD4	0.1369
MCPaCD4aCD8	aCD4	0.9031
aCD4	MCPaCD8	0.2238
aCD4	MTX	0.0115
aCD4	MTXaCD4	0.7729
MTXaCD4aCD8	aCD4	0.0717
MTXaCD8	aCD4	0.5807
aCD4aCD8	aCD8	0.1420
aCD4aCD8	Isotype	0.0279
aCD4aCD8	MCP	<0.0001
aCD4aCD8	MCPaCD4	<0.0001
aCD4aCD8	MCPaCD4aCD8	0.0079
aCD4aCD8	MCPaCD8	0.0001
aCD4aCD8	MTX	<0.0001
aCD4aCD8	MTXaCD4	0.0027
aCD4aCD8	MTXaCD4aCD8	0.3084
aCD4aCD8	MTXaCD8	0.0242
aCD8	Isotype	0.4447
aCD8	MCP	0.0001
aCD8	MCPaCD4	0.0055
aCD8	MCPaCD4aCD8	0.2090
aCD8	MCPaCD8	0.0114
aCD8	MTX	0.0002
aCD8	MTXaCD4	0.1011
MTXaCD4aCD8	aCD8	0.6468
aCD8	MTXaCD8	0.4090
Isotype	MCP	0.0015
Isotype	MCPaCD4	0.0370
Isotype	MCPaCD4aCD8	0.6174
Isotype	MCPaCD8	0.0682
Isotype	MTX	0.0021
Isotype	MTXaCD4	0.3670
MTXaCD4aCD8	Isotype	0.2241
Isotype	MTXaCD8	0.9494
MCPaCD4	MCP	0.2174
MCPaCD4aCD8	MCP	0.0060
MCPaCD8	MCP	0.1315
MTX	MCP	0.9183
MTXaCD4	MCP	0.0186
MTXaCD4aCD8	MCP	<0.0001
MTXaCD8	MCP	0.0018
MCPaCD4aCD8	MCPaCD4	0.1057
MCPaCD8	MCPaCD4	0.7760
MCPaCD4	MTX	0.2579
MTXaCD4	MCPaCD4	0.2299
MTXaCD4aCD8	MCPaCD4	0.0015
MTXaCD8	MCPaCD4	0.0430
MCPaCD4aCD8	MCPaCD8	0.1780
MCPaCD4aCD8	MTX	0.0079
MCPaCD4aCD8	MTXaCD4	0.6801
MTXaCD4aCD8	MCPaCD4aCD8	0.0893
MTXaCD8	MCPaCD4aCD8	0.6633
MCPaCD8	MTX	0.1594
MTXaCD4	MCPaCD8	0.3540
MTXaCD4aCD8	MCPaCD8	0.0033
MTXaCD8	MCPaCD8	0.0784
MTXaCD4	MTX	0.0239
MTXaCD4aCD8	MTX	<0.0001
MTXaCD8	MTX	0.0025
MTXaCD4aCD8	MTXaCD4	0.0385
MTXaCD8	MTXaCD4	0.4017
MTXaCD4aCD8	MTXaCD8	0.2022

## Sheet: Fig 3C_MCA Fpr1_MTX
Group 1	Group 2	Adjusted p value
PBS	CTX	0.0934
PBS	MTX	0.5603
PBS	MTX+CTX	0.3993
PBS	MTX+CTX+pIC	<0.0001
PBS	MTX+pIC	0.1124
PBS	pIC	0.1599
PBS	CTX+pIC	0.1032
pIC	CTX	0.7836
pIC	MTX+CTX+pIC	0.0014
pIC	MTX+pIC	0.8602
pIC	CTX+pIC	0.8226
CTX+pIC	CTX	0.9594
CTX+pIC	MTX+CTX+pIC	0.0028
CTX	MTX+CTX+pIC	0.0033
MTX	CTX	0.2756
MTX	MTX+CTX	0.7965
MTX	MTX+CTX+pIC	<0.0001
MTX	MTX+pIC	0.3187
MTX	pIC	0.4135
MTX	CTX+pIC	0.2977
MTX+CTX	CTX	0.4036
MTX+CTX	MTX+CTX+pIC	0.0002
MTX+CTX	MTX+pIC	0.4592
MTX+CTX	pIC	0.5745
MTX+CTX	CTX+pIC	0.4321
MTX+pIC	CTX	0.9201
MTX+pIC	MTX+CTX+pIC	0.0023
MTX+pIC	CTX+pIC	0.9608

## Sheet: Fig 3D_MCA A_MTX
Group 1	Group 2	Adjusted p value
PBS	CTX	0.3505
PBS	CTX+pIC	0.1496
PBS	MTX	0.9420
PBS	MTX+CTX	0.1084
PBS	MTX+pIC	0.4398
PBS	MTX+pIC+CTX	<0.0001
PBS	pIC	0.4547
pIC	CTX	0.8466
pIC	CTX+pIC	0.4768
pIC	MTX+CTX	0.3823
pIC	MTX+pIC	0.9795
pIC	MTX+pIC+CTX	0.0001
CTX	CTX+pIC	0.6062
CTX	MTX+CTX	0.4995
CTX	MTX+pIC+CTX	0.0002
CTX+pIC	MTX+CTX	0.8768
CTX+pIC	MTX+pIC+CTX	0.0011
MTX	CTX	0.4015
MTX	CTX+pIC	0.1820
MTX	MTX+CTX	0.1352
MTX	MTX+pIC	0.4958
MTX	MTX+pIC+CTX	<0.0001
MTX	pIC	0.5114
MTX+CTX	MTX+pIC+CTX	0.0015
MTX+pIC	CTX	0.8668
MTX+pIC	CTX+pIC	0.4930
MTX+pIC	MTX+CTX	0.3967
MTX+pIC	MTX+pIC+CTX	0.0001

## Sheet: Fig 4B_IF dying
Tukey's multiple comparisons test	Mean Diff,	95% CI of diff,	Adjusted p Value	Summary
PBS vs. pIC	0.3683	-2.834 to 3.570	0.9999	ns
PBS vs. DOXO	-2867	-7.048 to 1.314	0.3996	ns
PBS vs. DOXO + pIC	1315	-1.795 to 4.424	0.8751	ns
PBS vs. DOXO + CTX	1317	-1.761 to 4.395	0.8689	ns
PBS vs. pIC + CTX	3017	-0.2573 to 6.291	0.0939	ns
PBS vs. DOXO + pIC + CTX	3809	0.7230 to 6.894	0.0051	**
pIC vs. DOXO	-3235	-6.282 to -0.1891	0.0289	*
pIC vs. DOXO + pIC	0.9464	-0.2647 to 2.158	0.2413	ns
pIC vs. DOXO + CTX	0.9484	-0.1797 to 2.076	0.1665	ns
pIC vs. pIC + CTX	2649	1.062 to 4.236	< 0.0001	****
pIC vs. DOXO + pIC + CTX	3.44	2.291 to 4.589	< 0.0001	****
DOXO vs. DOXO + pIC	4182	1.233 to 7.131	0.0006	***
DOXO vs. DOXO + CTX	4184	1.268 to 7.100	0.0005	***
DOXO vs. pIC + CTX	5884	2.762 to 9.006	< 0.0001	****
DOXO vs. DOXO + pIC + CTX	6676	3.752 to 9.600	< 0.0001	****
DOXO + pIC vs. DOXO + CTX	0.001976	-0.8282 to 0.8322	> 0.9999	ns
DOXO + pIC vs. pIC + CTX	1702	0.3109 to 3.093	0.0058	**
DOXO + pIC vs. DOXO + pIC + CTX	2494	1.636 to 3.352	< 0.0001	****
DOXO + CTX vs. pIC + CTX	1.7	0.3807 to 3.020	0.0028	**
DOXO + CTX vs. DOXO + pIC + CTX	2492	1.756 to 3.228	< 0.0001	****
pIC + CTX vs. DOXO + pIC + CTX	0.7918	-0.5456 to 2.129	0.584	ns

## Sheet: Fig 4C_IF_CD11c+ CD86+
Tukey's multiple comparisons test	Mean Diff,	95% CI of diff,	Adjusted p Value	Summary
PBS vs. pIC	-0.5323	-0.9429 to -0.1218	0.0026	**
PBS vs. DOXO	-0.09679	-0.5271 to 0.3336	0.9944	ns
PBS vs. DOXO + pIC	-0.7351	-1.171 to -0.2997	< 0.0001	****
PBS vs. DOXO + CTX	-1212	-1.648 to -0.7767	< 0.0001	****
PBS vs. pIC + CTX	-0.2123	-0.6713 to 0.2467	0.8194	ns
PBS vs. DOXO + pIC + CTX	-0.8525	-1.273 to -0.4322	< 0.0001	****
pIC vs. DOXO	0.4355	0.1178 to 0.7532	0.0011	**
pIC vs. DOXO + pIC	-0.2028	-0.5273 to 0.1218	0.5167	ns
pIC vs. DOXO + CTX	-0.6798	-1.004 to -0.3553	< 0.0001	****
pIC vs. pIC + CTX	0.3201	-0.03548 to 0.6756	0.1098	ns
pIC vs. DOXO + pIC + CTX	-0.3202	-0.6241 to -0.01628	0.0313	*
DOXO vs. DOXO + pIC	-0.6383	-0.9876 to -0.2890	< 0.0001	****
DOXO vs. DOXO + CTX	-1115	-1.465 to -0.7661	< 0.0001	****
DOXO vs. pIC + CTX	-0.1155	-0.4937 to 0.2628	0.9722	ns
DOXO vs. DOXO + pIC + CTX	-0.7557	-1.086 to -0.4255	< 0.0001	****
DOXO + pIC vs. DOXO + CTX	-0.477	-0.8326 to -0.1215	0.0015	**
DOXO + pIC vs. pIC + CTX	0.5228	0.1388 to 0.9069	0.0012	**
DOXO + pIC vs. DOXO + pIC + CTX	-0.1174	-0.4542 to 0.2194	0.947	ns
DOXO + CTX vs. pIC + CTX	0.9999	0.6158 to 1.384	< 0.0001	****
DOXO + CTX vs. DOXO + pIC + CTX	0.3596	0.02283 to 0.6964	0.0275	*
pIC + CTX vs. DOXO + pIC + CTX	-0.6402	-1.007 to -0.2735	< 0.0001	****

## Sheet: Fig 4D_IF_Cleaved Casp3
Tukey's multiple comparisons test	Mean Diff,	95% CI of diff,	Adjusted p Value	Summary
PBS vs. pIC	-3257	-6.122 to -0.3932	0.0142	*
PBS vs. DOXO	-2963	-5.965 to 0.03985	0.0559	ns
PBS vs. DOXO + pIC	-2819	-5.857 to 0.2187	0.0892	ns
PBS vs. DOXO + CTX	-4741	-7.779 to -1.704	< 0.0001	****
PBS vs. pIC + CTX	-5068	-8.270 to -1.865	< 0.0001	****
PBS vs. DOXO + pIC + CTX	-8941	-11.87 to -6.009	< 0.0001	****
pIC vs. DOXO	0.2949	-1.922 to 2.511	0.9997	ns
pIC vs. DOXO + pIC	0.4381	-1.826 to 2.703	0.9976	ns
pIC vs. DOXO + CTX	-1484	-3.748 to 0.7803	0.4563	ns
pIC vs. pIC + CTX	-1.81	-4.291 to 0.6703	0.3204	ns
pIC vs. DOXO + pIC + CTX	-5684	-7.804 to -3.563	< 0.0001	****
DOXO vs. DOXO + pIC	0.1433	-2.294 to 2.580	> 0.9999	ns
DOXO vs. DOXO + CTX	-1779	-4.216 to 0.6579	0.3201	ns
DOXO vs. pIC + CTX	-2105	-4.744 to 0.5338	0.2182	ns
DOXO vs. DOXO + pIC + CTX	-5978	-8.282 to -3.675	< 0.0001	****
DOXO + pIC vs. DOXO + CTX	-1922	-4.403 to 0.5583	0.2498	ns
DOXO + pIC vs. pIC + CTX	-2248	-4.928 to 0.4309	0.1678	ns
DOXO + pIC vs. DOXO + pIC + CTX	-6122	-8.471 to -3.772	< 0.0001	****
DOXO + CTX vs. pIC + CTX	-0.3262	-3.005 to 2.353	0.9998	ns
DOXO + CTX vs. DOXO + pIC + CTX	-4.2	-6.549 to -1.850	< 0.0001	****
pIC + CTX vs. DOXO + pIC + CTX	-3873	-6.432 to -1.315	0.0002	***

## Sheet: Fig 4E_TI_RatioCD8+Tregs
Sidak's multiple comparisons test	Mean Diff,	95% CI of diff,	Adjusted p Value	Summary
WT:PBS vs. WT:pIC	-0.1645	-1,440 to 1,111	> 0,9999	ns
WT:PBS vs. WT:MTX	-1.861	-3,107 to -0,6150	< 0,0001	****
WT:PBS vs. WT:MTX+CTX	-1.535	-2,845 to -0,2260	0.0069	**
WT:PBS vs. WT:MTX+CTX+pIC	-1.934	-3,180 to -0,6877	< 0,0001	****
WT:PBS vs. KO:PBS	0.1518	-0,9952 to 1,299	> 0,9999	ns
WT:PBS vs. KO:pIC	0.2468	-1,029 to 1,522	> 0,9999	ns
WT:PBS vs. KO:MTX	0.1424	-1,104 to 1,389	> 0,9999	ns
WT:PBS vs. KO:MTX+CTX	-0.2105	-1,410 to 0,9886	> 0,9999	ns
WT:PBS vs. KO:MTX+CTX+pIC	-0.9446	-2,092 to 0,2024	0.2699	ns
WT:pIC vs. WT:MTX	-1.697	-2,996 to -0,3972	0.0013	**
WT:pIC vs. WT:MTX+CTX	-1.371	-2,731 to -0,01072	0.0459	*
WT:pIC vs. WT:MTX+CTX+pIC	-1.769	-3,069 to -0,4699	0.0006	***
WT:pIC vs. KO:PBS	0.3163	-0,8883 to 1,521	> 0,9999	ns
WT:pIC vs. KO:pIC	0.4114	-0,9160 to 1,739	> 0,9999	ns
WT:pIC vs. KO:MTX	0.3069	-0,9926 to 1,606	> 0,9999	ns
WT:pIC vs. KO:MTX+CTX	-0.04594	-1,300 to 1,208	> 0,9999	ns
WT:pIC vs. KO:MTX+CTX+pIC	-0.78	-1,985 to 0,4246	0.7774	ns
WT:MTX vs. WT:MTX+CTX	0.3258	-1,007 to 1,659	> 0,9999	ns
WT:MTX vs. WT:MTX+CTX+pIC	-0.07272	-1,344 to 1,198	> 0,9999	ns
WT:MTX vs. KO:PBS	2.013	0,8393 to 3,187	< 0,0001	****
WT:MTX vs. KO:pIC	2.108	0,8086 to 3,408	< 0,0001	****
WT:MTX vs. KO:MTX	2.004	0,7327 to 3,275	< 0,0001	****
WT:MTX vs. KO:MTX+CTX	1.651	0,4261 to 2,875	0.0007	***
WT:MTX vs. KO:MTX+CTX+pIC	0.9167	-0,2571 to 2,090	0.3747	ns
WT:MTX+CTX vs. WT:MTX+CTX+pIC	-0.3985	-1,731 to 0,9345	> 0,9999	ns
WT:MTX+CTX vs. KO:PBS	1.687	0,4466 to 2,928	0.0006	***
WT:MTX+CTX vs. KO:pIC	1.782	0,4221 to 3,143	0.0012	**
WT:MTX+CTX vs. KO:MTX	1.678	0,3449 to 3,011	0.0024	**
WT:MTX+CTX vs. KO:MTX+CTX	1.325	0,03604 to 2,614	0.0369	*
WT:MTX+CTX vs. KO:MTX+CTX+pIC	0.5909	-0,6497 to 1,832	0.9959	ns
WT:MTX+CTX+pIC vs. KO:PBS	2.086	0,9120 to 3,259	< 0,0001	****
WT:MTX+CTX+pIC vs. KO:pIC	2.181	0,8813 to 3,480	< 0,0001	****
WT:MTX+CTX+pIC vs. KO:MTX	2.076	0,8054 to 3,347	< 0,0001	****
WT:MTX+CTX+pIC vs. KO:MTX+CTX	1.723	0,4988 to 2,948	0.0003	***
WT:MTX+CTX+pIC vs. KO:MTX+CTX+pIC	0.9894	-0,1844 to 2,163	0.2296	ns
KO:PBS vs. KO:pIC	0.09506	-1,110 to 1,300	> 0,9999	ns
KO:PBS vs. KO:MTX	-0.009398	-1,183 to 1,164	> 0,9999	ns
KO:PBS vs. KO:MTX+CTX	-0.3623	-1,486 to 0,7613	> 0,9999	ns
KO:PBS vs. KO:MTX+CTX+pIC	-1.096	-2,164 to -0,02856	0.0374	*
KO:pIC vs. KO:MTX	-0.1045	-1,404 to 1,195	> 0,9999	ns
KO:pIC vs. KO:MTX+CTX	-0.4573	-1,712 to 0,7970	> 0,9999	ns
KO:pIC vs. KO:MTX+CTX+pIC	-1.191	-2,396 to 0,01321	0.0562	ns
KO:MTX vs. KO:MTX+CTX	-0.3529	-1,578 to 0,8718	> 0,9999	ns
KO:MTX vs. KO:MTX+CTX+pIC	-1.087	-2,261 to 0,08680	0.1068	ns
KO:MTX+CTX vs. KO:MTX+CTX+pIC	-0.7341	-1,858 to 0,3894	0.7611	ns

[truncated: 17 more sheets: Fig 7A_DMBA_tumor growth, Fig 7_DMBA survival, S1B, S3, S4A_MCA WT_DOXO, S4B_MCA Fpr1_DOXO, S4C_MCA A_DOXO, S4D_TC1 WT_DOXO, S4E_TC1 Fpr1_DOXO, S4F_TC1 Anxa_DOXO, S6A_TC1 WT_MTX, S6B_TC1 Fpr1_MTX, S6C_TC1 AnxA_MTX, S7B_cDC CD8+, S7D_Tregs, S7E_CD8+, S8C to E]
